# Supplementary material
Source: Springer Nature journal article supplement (https://www.springermedizin.de/resource/supplementary/12916_2006_80_MOESM3_ESM.pdf/9599126)

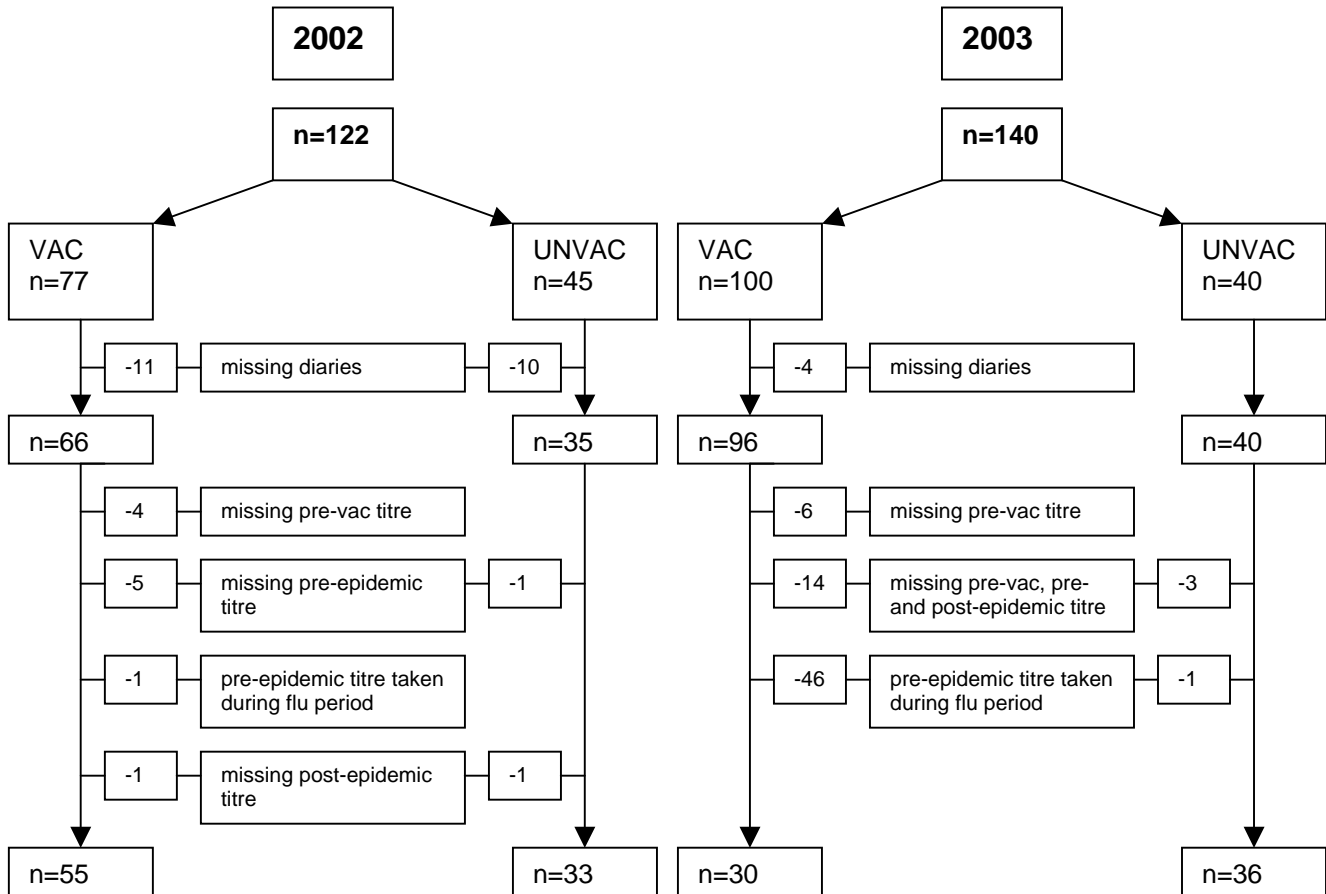

Supplement: MOESM3 [file 9599126]
